# Supplementary material
Source: publisher site journal article supplement (https://www.dovepress.com/article/286654)
Supplement: Supplementary file 1 [file get_supplementary_file.php]

Effect of paliperidone palmitate 3-month formulation on goal attainment and disability after 52 weeks' treatment in patients with clinically stable schizophrenia

**Supplementary appendix**

**Table S1** List of Institutional Review Boards and Ethics Committees  
Clinical Study Report R092670SCH3015

| <b>Region</b> | <b>IRB/EC Name/Address</b>                                                                                                     | <b>Site</b>                                                   | <b>Approval Date</b>                                       |
|---------------|--------------------------------------------------------------------------------------------------------------------------------|---------------------------------------------------------------|------------------------------------------------------------|
| Croatia       | Agency for Medicinal Product and Medical Devices of Croatia, Central Ethics Committee Ksaverska cesta 4 Zagreb, 10000 Croatia  | C68-HR10001<br>Spinčićeva 1<br>Split, 21000<br>Croatia        | Region: /<br>Site, Central: Sep 06,<br>2016 Site, Local: / |
| Croatia       | Ministry of Justice, Committe for the Protection of People with Mental Disorders Ulica grada Vukovara 49 Zagreb, 10000 Croatia | C68-HR10001<br>Spinčićeva 1<br>Split, 21000<br>Croatia        | Region: /<br>Site, Central: Sep 06,<br>2016 Site, Local: / |
| Croatia       | Agency for Medicinal Product and Medical Devices of Croatia, Central Ethics Committee Ksaverska cesta 4 Zagreb, 10000 Croatia  | C68-HR10002<br>Jankomir 11,<br>pp68 Zagreb,<br>10090 Croatia  | Region: /<br>Site, Central: Sep 06,<br>2016 Site, Local: / |
| Croatia       | Ministry of Justice, Committe for the Protection of People with Mental Disorders Ulica grada Vukovara 49 Zagreb, 10000 Croatia | C68-HR10002<br>Jankomir 11,<br>pp68 Zagreb,<br>10090 Croatia  | Region: /<br>Site, Central: Sep 06,<br>2016 Site, Local: / |
| Croatia       | Agency for Medicinal Product and Medical Devices of Croatia, Central Ethics Committee Ksaverska cesta 4 Zagreb, 10000 Croatia  | C68-<br>HR10003<br>Krešimirova<br>42 Rijeka,<br>51000 Croatia | Region: /<br>Site, Central: Sep 06,<br>2016 Site, Local: / |
| Croatia       | Ministry of Justice, Committe for the Protection of People with Mental Disorders Ulica grada Vukovara 49 Zagreb, 10000 Croatia | C68-<br>HR10003<br>Krešimirova<br>42 Rijeka,<br>51000 Croatia | Region: /<br>Site, Central: Sep 06,<br>2016 Site, Local: / |

| <b>Region</b> | <b>IRB/EC Name/Address</b>                                                                                               | <b>Site</b>                                                                  | <b>Approval Date</b>                                       |
|---------------|--------------------------------------------------------------------------------------------------------------------------|------------------------------------------------------------------------------|------------------------------------------------------------|
| Denmark       | Den Videnskabssetiske Komité for<br>Region Syddanmark<br>Regionshuset Damhaven 12<br>Vejele, Syddanmark, 7100<br>Denmark | C68-DK10001<br>Psykiatrisk<br>Afdeling Esbjerg,<br>6700 Denmark              | Region: /<br>Site, Central: Aug 17,<br>2016 Site, Local: / |
| France        | CPP Sed-Est VI<br>CHU. G. MONTPIED Administration<br>Centrale-BP.69<br>Clermont-Ferrand Cedex 1, 63003<br>France         | C68-FR10001<br>58 rue Montalembert<br>Clermont Ferrand,<br>63000 France      | Region: May 19,<br>2016 Site, Central: /<br>Site, Local: / |
| France        | CPP Sed-Est VI<br>CHU. G. MONTPIED Administration<br>Centrale-BP.69<br>Clermont-Ferrand Cedex 1, 63003<br>France         | C68-FR10002<br>108 avenue du général<br>Leclerc Rennes, 35703<br>France      | Region: May 19,<br>2016 Site, Central: /<br>Site, Local: / |
| France        | CPP Sed-Est VI<br>CHU. G. MONTPIED Administration<br>Centrale-BP.69<br>Clermont-Ferrand Cedex 1, 63003<br>France         | C68-FR10003<br>Avenue Sainte Claire<br>Deville Toulon, 83000<br>France       | Region: May 19,<br>2016 Site, Central: /<br>Site, Local: / |
| France        | CPP Sed-Est VI<br>CHU. G. MONTPIED Administration<br>Centrale-BP.69<br>Clermont-Ferrand Cedex 1, 63003<br>France         | C68-FR10004<br>39 Avenue Charles<br>Flahault Montpellier,<br>34090<br>France | Region: May 19,<br>2016 Site, Central: /<br>Site, Local: / |
| France        | CPP Sud-Est VI<br>CHU. G. MONTPIED Administration<br>Centrale-BP.69<br>Clermont-Ferrand, 63003 Cedex 1<br>France         | C68-FR10005<br>1 rue Cabanis<br>Paris, 75014<br>France                       | Region: May 19,<br>2016 Site, Central: /<br>Site, Local: / |

| <b>Region</b> | <b>IRB/EC Name/Address</b>                                                                                                                     | <b>Site</b>                                                           | <b>Approval Date</b>                                                  |
|---------------|------------------------------------------------------------------------------------------------------------------------------------------------|-----------------------------------------------------------------------|-----------------------------------------------------------------------|
| Germany       | Ethik-Kommission der Landesärztekammer Brandenburg Dreifertstr. 12 Cottbus, Brandenburg, 03044 Germany                                         | C68-DE10001 Langenhorner Chaussee 560, Haus 29 Hamburg, 22419 Germany | Region: Jun 07, 2016<br>Site, Central: /<br>Site, Local: Jun 02, 2016 |
| Germany       | Ethikkommission der Ärztekammer Hamburg; Körperschaft des öffentlichen Rechts Weidestr. 122b Hamburg, HH, 22083 Germany                        | C68-DE10001 Langenhorner Chaussee 560, Haus 29 Hamburg, 22419 Germany | Region: Jun 07, 2016<br>Site, Central: /<br>Site, Local: Jun 02, 2016 |
| Germany       | Landesamt für Gesundheit und Soziales Berlin Geschäftsstelle der Ethik-Kommission des Landes Berlin Fehrbelliner Platz 1 Berlin, 10707 Germany | C68-DE10001 Langenhorner Chaussee 560, Haus 29 Hamburg, 22419 Germany | Region: Jun 07, 2016<br>Site, Central: /<br>Site, Local: Jun 02, 2016 |
| Germany       | Ethik-Kommission der Landesärztekammer Brandenburg Dreifertstr. 12 Cottbus, Brandenburg, 03044 Germany                                         | C68-DE10002 Charitéplatz 1 Berlin, 10117 Germany                      | Region: Jun 07, 2016<br>Site, Central: /<br>Site, Local: Apr 13, 2016 |
| Germany       | Landesamt für Gesundheit und Soziales Berlin Geschäftsstelle der Ethik-Kommission des Landes Berlin Fehrbelliner Platz 1 Berlin, 10707 Germany | C68-DE10002 Charitéplatz 1 Berlin, 10117 Germany                      | Region: Jun 07, 2016<br>Site, Central: /<br>Site, Local: Apr 13, 2016 |
| Germany       | Ethikkommission der Ärztekammer Hamburg; Körperschaft des öffentlichen Rechts Weidestr. 122b Hamburg, HH, 22083 Germany                        | C68-DE10003 Bengelsdorfstraße 5 Hamburg, 22179 Germany                | Region: Jun 07, 2016<br>Site, Central: /<br>Site, Local: Jun 02, 2016 |

| <b>Region</b> | <b>IRB/EC Name/Address</b>                                                                                                                                                                                                     | <b>Site</b>                                                         | <b>Approval Date</b>                                                     |
|---------------|--------------------------------------------------------------------------------------------------------------------------------------------------------------------------------------------------------------------------------|---------------------------------------------------------------------|--------------------------------------------------------------------------|
| Germany       | Landesamt für Gesundheit und Soziales<br>Berlin Geschäftsstelle der Ethik-<br>Kommission des Landes Berlin<br>Fehrbelliner Platz 1<br>Berlin, 10707<br>Germany                                                                 | C68-DE10003<br>Bengelsdorfstraße 5<br>Hamburg, 22179<br>Germany     | Region: Jun 07, 2016<br>Site, Central: /<br>Site, Local: Jun 02,<br>2016 |
| Germany       | Ethik-Kommission der<br>Landesärztekammer Brandenburg<br>Dreifertstr. 12<br>Cottbus, Brandenburg, 03044<br>Germany                                                                                                             | C68-DE10004<br>Herzbergstr. 82<br>Berlin, 10365<br>Germany          | Region: Jun 07, 2016<br>Site, Central: /<br>Site, Local: Apr 13,<br>2016 |
| Germany       | Landesamt für Gesundheit und Soziales<br>Berlin Geschäftsstelle der Ethik-<br>Kommission des Landes Berlin<br>Fehrbelliner Platz 1<br>Berlin, 10707<br>Germany                                                                 | C68-DE10004<br>Herzbergstr. 82<br>Berlin, 10365<br>Germany          | Region: Jun 07, 2016<br>Site, Central: /<br>Site, Local: Apr 13,<br>2016 |
| Germany       | Ethik-Kommission der<br>Landesärztekammer Brandenburg<br>Dreifertstr. 12<br>Cottbus, Brandenburg, 03044<br>Germany                                                                                                             | C68-DE10005<br>Olof-Palme-Platz 4<br>Stralsund, 18439<br>Germany    | Region: Jun 07, 2016<br>Site, Central: /<br>Site, Local: Apr 13,<br>2016 |
| Germany       | Ethikkommission der<br>Universitätsmedizin Greifswald; Institut<br>für Pharmakologie Felix-Hausdorff-Str.<br>3 Ethikkommission der<br>Universitätsmedizin Greifswald Institut f.<br>Pharmakologie<br>Greifswald, 17487 Germany | C68-DE10005<br>Olof-Palme-Platz<br>4 Stralsund,<br>18439<br>Germany | Region: Jun 07, 2016<br>Site, Central: /<br>Site, Local: Apr 13,<br>2016 |

| <b>Region</b> | <b>IRB/EC Name/Address</b>                                                                                                                                       | <b>Site</b>                                                                          | <b>Approval Date</b>                                                     |
|---------------|------------------------------------------------------------------------------------------------------------------------------------------------------------------|--------------------------------------------------------------------------------------|--------------------------------------------------------------------------|
| Germany       | Landesamt für Gesundheit und Soziales<br>Berlin Geschäftsstelle der Ethik-<br>Kommission des Landes Berlin<br>Fehrbelliner Platz 1<br>Berlin, 10707<br>Germany   | C68-DE10005<br>Olof-Palme-Platz<br>4 Stralsund,<br>18439 Germany                     | Region: Jun 07, 2016<br>Site, Central: /<br>Site, Local: Apr 13,<br>2016 |
| Germany       | Ethik-Kommission der<br>Landesärztekammer Brandenburg<br>Dreifertstr. 12<br>Cottbus, Brandenburg, 03044<br>Germany                                               | C68-DE10007<br>Granseerstr. 23b<br>Oranienburg,<br>16515 Germany                     | Region: Jun 07, 2016<br>Site, Central: /<br>Site, Local: Nov 23,<br>2016 |
| Germany       | Landesamt für Gesundheit und Soziales<br>Berlin Geschäftsstelle der Ethik-<br>Kommission des Landes Berlin<br>Fehrbelliner Platz 1<br>Berlin, 10707<br>Germany   | C68-DE10007<br>Granseerstr. 23b<br>Oranienburg,<br>16515 Germany                     | Region: Jun 07, 2016<br>Site, Central: /<br>Site, Local: Nov 23,<br>2016 |
| Great Britain | Berkshire Healthcare Foundation Trust<br>2nd, 3rd and 4th Floors, Fitzwilliam<br>House Skimped Hill Lane<br>Bracknell, West Berkshire, RG12 1BQ<br>Great Britain | C68-GB10001<br>University of Reading<br>Reading, Berkshire, RG6<br>7BE Great Britain | Region: Mar 23, 2016<br>Site, Central: /<br>Site, Local: Aug 11,<br>2016 |
| Great Britain | Scottish A Research Ethics Committee<br>2nd Floor Waverley Gate, 2-4 Waterloo<br>Place Edinburgh, EH1 3EG<br>Great Britain                                       | C68-GB10001<br>University of Reading<br>Reading, Berkshire, RG6<br>7BE Great Britain | Region: Mar 23, 2016<br>Site, Central: /<br>Site, Local: Aug 11,<br>2016 |
| Great Britain | NHS Lothian Research & Development<br>Office 47 Little France Crescent Queen's<br>Medical Research Institute<br>Edinburgh, EH16 4TJ<br>Great Britain             | C68-GB10003<br>Kennedy Tower<br>Edinburgh, EH10<br>5HF Great Britain                 | Region: Mar 23, 2016<br>Site, Central: /<br>Site, Local: Aug 02,<br>2016 |
|               |                                                                                                                                                                  |                                                                                      |                                                                          |

| <b>Region</b> | <b>IRB/EC Name/Address</b>                                                                                                 | <b>Site</b>                                                                     | <b>Approval Date</b>                                                     |
|---------------|----------------------------------------------------------------------------------------------------------------------------|---------------------------------------------------------------------------------|--------------------------------------------------------------------------|
| Great Britain | Scottish A Research Ethics Committee<br>2nd Floor Waverley Gate, 2-4 Waterloo<br>Place Edinburgh, EH1 3EG<br>Great Britain | C68-GB10003<br>Kennedy Tower<br>Edinburgh, EH10<br>5HF Great Britain            | Region: Mar 23, 2016<br>Site, Central: /<br>Site, Local: Aug 02,<br>2016 |
| Great Britain | Derbyshire Healthcare NHS Foundation<br>Trust Kingsway<br>Derby, Derbyshire, DE22 3LZ<br>Great Britain                     | C68-GB10006<br>Uttoxeter Road<br>Derby, DE22<br>3WQ Great<br>Britain            | Region: Mar 23, 2016<br>Site, Central: /<br>Site, Local: Aug 11,<br>2016 |
| Great Britain | Scottish A Research Ethics Committee<br>2nd Floor Waverley Gate, 2-4 Waterloo<br>Place Edinburgh, EH1 3EG<br>Great Britain | C68-GB10006<br>Uttoxeter Road<br>Derby, DE22<br>3WQ Great<br>Britain            | Region: Mar 23, 2016<br>Site, Central: /<br>Site, Local: Aug 11,<br>2016 |
| Greece        | National Ethics Committee -<br>Greece 284 Mesogeion Avenue<br>Holargos - Athens, 15562<br>Greece                           | C68-GR10001<br>374 Athinon<br>avenue Athens,<br>Attica, 12462<br>Greece         | Region: /<br>Site, Central: Oct 19,<br>2016 Site, Local: Sep<br>08, 2016 |
| Greece        | Scientific Council of Psychiatric Hospital<br>of Attiki "Dafni"<br>374 Athinon Avenue<br>Athens, 12462<br>Greece           | C68-GR10001<br>374 Athinon<br>avenue Athens,<br>Attica, 12462<br>Greece         | Region: /<br>Site, Central: Oct 19,<br>2016 Site, Local: Sep<br>08, 2016 |
| Greece        | National Ethics Committee -<br>Greece 284 Mesogeion Avenue<br>Holargos - Athens, 15562<br>Greece                           | C68-GR10002<br>Neas Efkarpas peripheral<br>street Thessaloniki, 56429<br>Greece | Region: /<br>Site, Central: Oct 19,<br>2016 Site, Local: Oct<br>14, 2016 |

| <b>Region</b> | <b>IRB/EC Name/Address</b>                                                                                                               | <b>Site</b>                                                                                     | <b>Approval Date</b>                                                  |
|---------------|------------------------------------------------------------------------------------------------------------------------------------------|-------------------------------------------------------------------------------------------------|-----------------------------------------------------------------------|
| Greece        | Scientific Council of General Hospital of Thessaloniki "Papageorgiou"<br>Nea Efkarpia Peripheral Street<br>Thessaloniki, 56429<br>Greece | C68-GR10002<br>Neas Efkarpias peripheral street<br>Thessaloniki, 56429<br>Greece                | Region: /<br>Site, Central: Oct 19, 2016<br>Site, Local: Oct 14, 2016 |
| Greece        | National Ethics Committee - Greece<br>284 Mesogeion Avenue<br>Holargos - Athens, 15562<br>Greece                                         | C68-GR10003<br>152 Mesogeion avenue<br>Athens, Attica, 11527<br>Greece                          | Region: /<br>Site, Central: Oct 19, 2016<br>Site, Local: Jul 28, 2016 |
| Greece        | Scientific Council of General Hospital of Athens of Chest Diseases "Sotiria"<br>152 Mesogeion Ave.<br>Athens, 11527<br>Greece            | C68-GR10003<br>152 Mesogeion avenue<br>Athens, Attica, 11527<br>Greece                          | Region: /<br>Site, Central: Oct 19, 2016<br>Site, Local: Jul 28, 2016 |
| Greece        | National Ethics Committee - Greece<br>284 Mesogeion Avenue<br>Holargos - Athens, 15562<br>Greece                                         | C68-GR10004<br>82 Megalou Alexandrou street<br>Heraklion, Crete, 71305<br>Greece                | Region: /<br>Site, Central: Oct 19, 2016<br>Site, Local: Sep 08, 2016 |
| Greece        | Scientific Council of Psychiatric Clinic "Agios Charalambos"<br>82 Megalou Alexandrou Street<br>Heraklion - Crete, 71305<br>Greece       | C68-GR10004<br>82 Megalou Alexandrou street<br>Heraklion, Crete, 71305<br>Greece                | Region: /<br>Site, Central: Oct 19, 2016<br>Site, Local: Sep 08, 2016 |
| Greece        | National Ethics Committee - Greece<br>284 Mesogeion Avenue<br>Holargos - Athens, 15562<br>Greece                                         | C68-GR10005<br>14 Timiou Stavrou str & 1 Noufaron str.<br>Nea Kifissia, Attica, 14564<br>Greece | Region: /<br>Site, Central: Oct 19, 2016<br>Site, Local: Sep 07, 2016 |



| <b>Region</b> | <b>IRB/EC Name/Address</b>                                                                                                                      | <b>Site</b>                                                                               | <b>Approval Date</b>                                                  |
|---------------|-------------------------------------------------------------------------------------------------------------------------------------------------|-------------------------------------------------------------------------------------------|-----------------------------------------------------------------------|
| Greece        | Scientific Council of General Oncology Hospital of Kifissia "Agioi Anargyroi" 14 Timiou Stavrou str & 1 Noufaron str Athens, 14564 Greece       | C68-GR10005<br>14 Timiou Stavrou str & 1 Noufaron str. Nea Kifissia, Attica, 14564 Greece | Region: /<br>Site, Central: Oct 19, 2016<br>Site, Local: Sep 07, 2016 |
| Israel        | Sheba Medical Center Ethics Committee 2 Derech Sheba, Tel HaShomer<br>Ramat Gan, 5266202<br>Israel                                              | C68-IL10002<br>Tel Hashomer, Ramat Gan<br>52621 Ramat Gan, 52621<br>Israel                | Region: /<br>Site, Central: /<br>Site, Local: Jul 24, 2016            |
| Israel        | Beer Yaakov Mental Health Center<br>EC Beer Yaakov 70350, Israel<br>Beer Yaakov, 70350<br>Israel                                                | C68-IL10005<br>Beer Yaakov 70350,<br>Israel Beer Yaakov,<br>70350 Israel                  | Region: /<br>Site, Central: /<br>Site, Local: Aug 14, 2016            |
| Italy         | Comitato Etico Indipendente della A.O.U. di Cagliari<br>via Ospedale, 54<br>Cagliari, CA, 09124<br>Italy                                        | C68-IT10001<br>Clinica Psichiatrica via Liguria,<br>13 Cagliari, 9127<br>Italy            | Region: /<br>Site, Central: /<br>Site, Local: Apr 27, 2016            |
| Italy         | Comitato Etico Area 3 Azienda Sanitaria Locale di Lecce<br>via Miglietta, 5<br>Lecce, 73100<br>Italy                                            | C68-IT10002<br>via Miglietta,<br>5 Lecce,<br>73100 Italy                                  | Region: /<br>Site, Central: /<br>Site, Local: May 30, 2016            |
| Italy         | Comitato Etico Interaziendale Azienda Ospedaliero Un. San Luigi<br>Gonzaga di Orbassano<br>Regione Gonzole, 10<br>ORBASSANO, TO, 10043<br>Italy | C68-IT10003<br>Regione Gonzole, 10<br>Orbassano, Turin,<br>10043 Italy                    | Region: /<br>Site, Central: Mar 17, 2016<br>Site, Local: /            |

| <b>Region</b> | <b>IRB/EC Name/Address</b>                                                                                                                                                                     | <b>Site</b>                                                                  | <b>Approval Date</b>                                          |
|---------------|------------------------------------------------------------------------------------------------------------------------------------------------------------------------------------------------|------------------------------------------------------------------------------|---------------------------------------------------------------|
| Italy         | Comitato Etico per<br>Parma Via Gramsci 14<br>Parma, 43126<br>Italy                                                                                                                            | C68-IT10004<br>'Braga'<br>Building<br>Parma, 43126<br>Italy                  | Region: /<br>Site, Central: /<br>Site, Local: Jul 19,<br>2016 |
| Italy         | Comitato Etico Regione Liguria<br>c/o IRCCS Az. Ospedaliera Universitaria<br>San Martino IST Istituto Nazionale per la<br>Ricerca sul Cancro Largo Rosanna<br>Benzi, 10 Genova, 16132<br>Italy | C68-IT10005<br>via Lemerle,<br>17 Genoa,<br>16158 Italy                      | Region: /<br>Site, Central: /<br>Site, Local: Nov 11,<br>2016 |
| Korea         | Chonbuk National University Hospital<br>IRB 20 Geonji-ro, Deokjin-gu<br>Jeonju, 54907<br>Korea                                                                                                 | C68-KR10001<br>20 Geonji-ro, Deokjin-<br>gu Jeonju, 54907<br>Korea           | Region: /<br>Site, Central: /<br>Site, Local: Jun 14,<br>2016 |
| Korea         | CHA Bundang Medical center, CHA<br>University IRB<br>59 Yatap-ro Bundang-gu<br>Seongnam, Gyeong-gi, 13496<br>Korea                                                                             | C68-KR10002<br>59 Yatap-ro Bundang-gu<br>Seongnam, Gyeong-gi,<br>13496 Korea | Region: /<br>Site, Central: /<br>Site, Local: Apr 06,<br>2016 |
| Korea         | Seoul National University Hospital<br>IRB 101 DAEHAK-RO JONGNO-<br>GU Seoul, 03080<br>Korea                                                                                                    | C68-KR10003<br>101 Daehak-Ro Jongno-<br>Gu Seoul, Seoul, 03080<br>Korea      | Region: /<br>Site, Central: /<br>Site, Local: May 31,<br>2016 |
| Korea         | Chonnam National University Hospital<br>Institutional Review Board<br>6F, Building no.3, Chonnam National<br>University Hospital 42 Jebong-ro,<br>Dong-gu Gwangju, 501-757<br>Korea            | C68-KR10004<br>42 Jebong-Ro<br>Gwangju,<br>61469 Korea                       | Region: /<br>Site, Central: /<br>Site, Local: Apr 20,<br>2016 |

| <b>Region</b> | <b>IRB/EC Name/Address</b>                                                                                                   | <b>Site</b>                                                                                | <b>Approval Date</b>                                       |
|---------------|------------------------------------------------------------------------------------------------------------------------------|--------------------------------------------------------------------------------------------|------------------------------------------------------------|
| Malaysia      | Medical Research Ethics Committee, University Malaya Medical Centre Lembah Pantai Kuala Lumpur, Kuala Lumpur, 59100 Malaysia | C68-MY10001<br>1st Floor , Psychiatric Complex, Lembah Pantai Kuala Lumpur, 59100 Malaysia | Region: /<br>Site, Central: /<br>Site, Local: Mar 16, 2016 |
| Malaysia      | Medical Research And Ethics Committee (MREC)<br>Jalan Rumah Sakit Bangsar Kuala Lumpur, Kuala Lumpur, 50900 Malaysia         | C68-MY10002<br>Klinik Pakar Ipoh, Perak, 31250 Malaysia                                    | Region: /<br>Site, Central: Apr 18, 2016 Site, Local: /    |
| Malaysia      | Medical Research And Ethics Committee (MREC)<br>Jalan Rumah Sakit Bangsar Kuala Lumpur, Kuala Lumpur, 50900 Malaysia         | C68-MY10003<br>Jalan Persiaran Kempas Baru Johor Bahru, Johor, 81200 Malaysia              | Region: /<br>Site, Central: Apr 18, 2016 Site, Local: /    |
| Malaysia      | Medical Research And Ethics Committee (MREC)<br>Jalan Rumah Sakit Bangsar Kuala Lumpur, Kuala Lumpur, 50900 Malaysia         | C68-MY10004<br>Bangunan IKTAR, Jalan Pahang Kuala Lumpur, 50586 Malaysia                   | Region: /<br>Site, Central: Apr 18, 2016 Site, Local: /    |
| Netherlands   | Medical Research Ethics Committees<br>United Postbus 2500 NIEUWEGEIN, 3430 Netherlands                                       | C68-NL10001<br>Hereweg 80 Groningen, 9700 AB Netherlands                                   | Region: /<br>Site, Central: Jul 08, 2016 Site, Local: /    |
| Netherlands   | Medical Research Ethics Committees<br>United Postbus 2500 NIEUWEGEIN, 3430 Netherlands                                       | C68-NL10002<br>Dennenweg 9 Assen, 9400 RA Netherlands                                      | Region: /<br>Site, Central: Jul 08, 2016 Site, Local: /    |

| <b>Region</b> | <b>IRB/EC Name/Address</b>                                                                                                               | <b>Site</b>                                                                           | <b>Approval Date</b>                                       |
|---------------|------------------------------------------------------------------------------------------------------------------------------------------|---------------------------------------------------------------------------------------|------------------------------------------------------------|
| Russia        | Independent Interdisciplinary Committee on Ethics Expertise of Clinical Trials<br>51, Leningradskiy prospect<br>Moscow, 125468<br>Russia | C68-RU10001<br>3, Matveeva per.<br>St-Petersburg,<br>190121 Russia                    | Region: /<br>Site, Central: Feb 12,<br>2016 Site, Local: / |
| Russia        | Independent Interdisciplinary Committee on Ethics Expertise of Clinical Trials<br>51, Leningradskiy prospect<br>Moscow, 125468<br>Russia | C68-RU10002<br>2, Zagorodnoe<br>sh. Moscow,<br>117152 Russia                          | Region: /<br>Site, Central: Feb 12,<br>2016 Site, Local: / |
| Russia        | Independent Interdisciplinary Committee on Ethics Expertise of Clinical Trials<br>51, Leningradskiy prospect<br>Moscow, 125468<br>Russia | C68-RU10003<br>3, Bekhtereva str.<br>St-Petersburg,<br>192109 Russia                  | Region: /<br>Site, Central: Feb 12,<br>2016 Site, Local: / |
| Russia        | Independent Interdisciplinary Committee on Ethics Expertise of Clinical Trials<br>51, Leningradskiy prospect<br>Moscow, 125468<br>Russia | C68-RU10004<br>21A, Podyezdnoy<br>pereulok St-Petersburg,<br>190013 Russia            | Region: /<br>Site, Central: Feb 12,<br>2016 Site, Local: / |
| Russia        | Independent Interdisciplinary Committee on Ethics Expertise of Clinical Trials<br>51, Leningradskiy prospect<br>Moscow, 125468<br>Russia | C68-RU10005<br>20, Matrosskaya Tishina<br>Str Moscow, 107076<br>Russia                | Region: /<br>Site, Central: Feb 12,<br>2016 Site, Local: / |
| Russia        | Independent Interdisciplinary Committee on Ethics Expertise of Clinical Trials<br>51, Leningradskiy prospect<br>Moscow, 125468<br>Russia | C68-RU10006<br>39, 12th line of Vasilievsky<br>ostrov St-Petersburg, 199178<br>Russia | Region: /<br>Site, Central: Feb 12,<br>2016 Site, Local: / |

| <b>Region</b> | <b>IRB/EC Name/Address</b>                                                                                                                                                         | <b>Site</b>                                                        | <b>Approval Date</b>                                                     |
|---------------|------------------------------------------------------------------------------------------------------------------------------------------------------------------------------------|--------------------------------------------------------------------|--------------------------------------------------------------------------|
| Saudi Arabia  | Institutional Review Board of King Fahad Medical City<br>Makkah Al Mukarramah Branch Rd,<br>As Sulimaniyah<br>Riyadh, 11525<br>Saudi Arabia                                        | C68-SA10001<br>Al Mahgar<br>street Jedda,<br>22421 Saudi<br>Arabia | Region: /<br>Site, Central: Sep 19,<br>2016 Site, Local: /               |
| Spain         | CEIC Area 1 - Hospital General Universitario Gregorio Marañón<br>C/ Doctor Esquerdo, 46<br>Madrid, 28007<br>Spain                                                                  | C68-ES10001<br>Gran Via Del Estes<br>80 Madrid, 28031<br>Spain     | Region: Mar 07, 2016<br>Site, Central: /<br>Site, Local: Mar 07,<br>2016 |
| Spain         | Comité Ético de Investigación Clínica de Euskadi<br>Dirección de Farmacia Departamento de Sanidad del Gobierno Vasco C/<br>Donostia-San Sebastián, nº 1<br>Vitoria, 01010<br>Spain | C68-ES10001<br>Gran Via Del Estes<br>80 Madrid, 28031<br>Spain     | Region: Mar 07, 2016<br>Site, Central: /<br>Site, Local: Mar 07,<br>2016 |
| Spain         | CEIC Hospital Universitari de Bellvitge<br>Feixa Llarga, s/n Edifici de Suport a la Recerca Hospitalet de Llobregat, 8907<br>Spain                                                 | C68-ES10002<br>Feixa Llarga s/<br>n Barcelona,<br>08907 Spain      | Region: Mar 07,<br>2016 Site, Central: /<br>Site, Local: /               |
| Spain         | Comité Ético de Investigación Clínica de Euskadi<br>Dirección de Farmacia Departamento de Sanidad del Gobierno Vasco C/<br>Donostia-San Sebastián, nº 1<br>Vitoria, 01010<br>Spain | C68-ES10002<br>Feixa Llarga s/<br>n Barcelona,<br>08907 Spain      | Region: Mar 07,<br>2016 Site, Central: /<br>Site, Local: /               |

| <b>Region</b> | <b>IRB/EC Name/Address</b>                                                                                                                                                         | <b>Site</b>                                                              | <b>Approval Date</b>                                                     |
|---------------|------------------------------------------------------------------------------------------------------------------------------------------------------------------------------------|--------------------------------------------------------------------------|--------------------------------------------------------------------------|
| Spain         | Comité Ético de Investigación<br>Clínica de Asturias<br>C/ Celestino Villamil, s/n<br>Oviedo, Asturias, 33006<br>Spain                                                             | C68-ES10003<br>C/ Alfredo Blanco<br>s/n Oviedo, 33011<br>Spain           | Region: Mar 07, 2016<br>Site, Central: /<br>Site, Local: Mar 07,<br>2016 |
| Spain         | Comité Ético de Investigación Clínica de Euskadi<br>Dirección de Farmacia Departamento de Sanidad del Gobierno Vasco C/<br>Donostia-San Sebastián, nº 1<br>Vitoria, 01010<br>Spain | C68-ES10003<br>C/ Alfredo Blanco<br>s/n Oviedo, 33011<br>Spain           | Region: Mar 07, 2016<br>Site, Central: /<br>Site, Local: Mar 07,<br>2016 |
| Spain         | CEIC HOSPITAL CLINICO<br>UNIVERSITARIO DE VALENCIA<br>Avda. Blasco Ibáñez, 17<br>Valencia, 46010<br>Spain                                                                          | C68-ES10004<br>Avinguda de Blasco Ibáñez,<br>17 Valencia, 46010<br>Spain | Region: Mar 07, 2016<br>Site, Central: /<br>Site, Local: Mar 07,<br>2016 |
| Spain         | Comité Ético de Investigación Clínica de Euskadi<br>Dirección de Farmacia Departamento de Sanidad del Gobierno Vasco C/<br>Donostia-San Sebastián, nº 1<br>Vitoria, 01010<br>Spain | C68-ES10004<br>Avinguda de Blasco Ibáñez,<br>17 Valencia, 46010<br>Spain | Region: Mar 07, 2016<br>Site, Central: /<br>Site, Local: Mar 07,<br>2016 |
| Spain         | Comité Ético de Investigación Clínica de Euskadi<br>Dirección de Farmacia Departamento de Sanidad del Gobierno Vasco C/<br>Donostia-San Sebastián, nº 1<br>Vitoria, 01010<br>Spain | C68-ES10005<br>C/Ronda, 6<br>Bilbao, 48005<br>Spain                      | Region: Mar 07, 2016<br>Site, Central: Mar 07,<br>2016 Site, Local: /    |

| <b>Region</b> | <b>IRB/EC Name/Address</b>                                                                                                                                                               | <b>Site</b>                                                                                                                 | <b>Approval Date</b>                                                     |
|---------------|------------------------------------------------------------------------------------------------------------------------------------------------------------------------------------------|-----------------------------------------------------------------------------------------------------------------------------|--------------------------------------------------------------------------|
| Spain         | CEIC Corporacio Sanitaria Parc Tauli<br>Parc Tauli, 1 Edifici Santa Fe, ala<br>izquierda planta 2 <sup>a</sup><br>Sabadell, Cataluña, 8208<br>Spain                                      | C68-ES10006<br>Parc Taulí, 1<br>Sabadell,<br>08208 Spain                                                                    | Region: Mar 07, 2016<br>Site, Central: /<br>Site, Local: Mar 07,<br>2016 |
| Spain         | Comité Ético de Investigación Clínica de<br>Euskadi<br>Dirección de Farmacia Departamento de<br>Sanidad del Gobierno Vasco C/<br>Donostia-San Sebastián, nº 1<br>Vitoria, 01010<br>Spain | C68-ES10006<br>Parc Taulí, 1<br>Sabadell,<br>08208 Spain                                                                    | Region: Mar 07, 2016<br>Site, Central: /<br>Site, Local: Mar 07,<br>2016 |
| Spain         | CEIC Hospital Torrevieja-Elche-<br>Vinalopo Cter San Miguel-Cv95<br>Partida La Ceñuela Alicante, 3186<br>Spain                                                                           | C68-ES10007<br>Ctra. Torrevieja a San Miguel de Salinas<br>Cv 95 Partida La Ceñuela<br>Torrevieja, Alicante, 03186<br>Spain | Region: Mar 07, 2016<br>Site, Central: /<br>Site, Local: Mar 07,<br>2016 |
| Spain         | Comité Ético de Investigación Clínica de<br>Euskadi<br>Dirección de Farmacia Departamento de<br>Sanidad del Gobierno Vasco C/<br>Donostia-San Sebastián, nº 1<br>Vitoria, 01010<br>Spain | C68-ES10007<br>Ctra. Torrevieja a San Miguel de Salinas<br>Cv 95 Partida La Ceñuela<br>Torrevieja, Alicante, 03186<br>Spain | Region: Mar 07, 2016<br>Site, Central: /<br>Site, Local: Mar 07,<br>2016 |
| Taiwan        | Chang Gung Medical Foundation<br>Institutional Review Board<br>B2F., No.123, Dinghu Rd., Guishan Dist.<br>Taoyuan, 333<br>Taiwan                                                         | C68-TW10001<br>Psychiatry office, 3F, Rehabilitation<br>Building, No.5<br>Taoyuan, 33305<br>Taiwan                          | Region: /<br>Site, Central: /<br>Site, Local: Apr 18,<br>2016            |

| <b>Region</b> | <b>IRB/EC Name/Address</b>                                                                                                                                                                   | <b>Site</b>                                                                                                  | <b>Approval Date</b>                                          |
|---------------|----------------------------------------------------------------------------------------------------------------------------------------------------------------------------------------------|--------------------------------------------------------------------------------------------------------------|---------------------------------------------------------------|
| Taiwan        | National Cheng Kung University<br>Hospital Institutional Review Board<br>No.138,Sheng Li Road<br>Tainan, 70403<br>Taiwan                                                                     | C68-TW10002<br>Room 820346, No. 138, Sheng Li<br>Road Tainan, 70403<br>Taiwan                                | Region: /<br>Site, Central: /<br>Site, Local: Mar 22,<br>2016 |
| Taiwan        | Institutional Review Board, Bali<br>Psychiatric Center, Ministry of Health<br>and Welfare No.33, Huafushan, Bali<br>Dist.<br>New Taipei City, 24936<br>Taiwan                                | C68-TW10003<br>Sector of Teaching & Research, 5F,<br>OPD Building, No.33<br>New Taipei City, 24936<br>Taiwan | Region: /<br>Site, Central: /<br>Site, Local: Apr 27,<br>2016 |
| Turkey        | Ankara University Medical Faculty<br>Clinical Research Ethics Committee<br>Ankara Üniversitesi Tıp Fakültesi<br>Dekanlığı Klinik Araştırmalar Etik Kurulu<br>Sıhhiye Ankara, 06100<br>Turkey | C68-TR10001<br>Sıhhiye<br>Ankara, 61100<br>Turkey                                                            | Region: /<br>Site, Central: Mar 14,<br>2016 Site, Local: /    |
| Turkey        | Ankara University Medical Faculty<br>Clinical Research Ethics Committee<br>Ankara Üniversitesi Tıp Fakültesi<br>Dekanlığı Klinik Araştırmalar Etik Kurulu<br>Sıhhiye Ankara, 06100<br>Turkey | C68-TR10003<br>Sakarya Üniversitesi Tıp<br>Fakültesi Sakarya, 54187<br>Turkey                                | Region: /<br>Site, Central: Mar 14,<br>2016 Site, Local: /    |
| Turkey        | Ankara University Medical Faculty<br>Clinical Research Ethics Committee<br>Ankara Üniversitesi Tıp Fakültesi<br>Dekanlığı Klinik Araştırmalar Etik Kurulu<br>Sıhhiye Ankara, 06100<br>Turkey | C68-TR10004<br>Mehmet Akif Ersoy Mahallesi 13.<br>Cadde Ankara, 6200<br>Turkey                               | Region: /<br>Site, Central: Mar 15,<br>2016 Site, Local: /    |



| <b>Region</b> | <b>IRB/EC Name/Address</b>                                                                                                                                                                   | <b>Site</b>                                                                                                                                  | <b>Approval Date</b>                                       |
|---------------|----------------------------------------------------------------------------------------------------------------------------------------------------------------------------------------------|----------------------------------------------------------------------------------------------------------------------------------------------|------------------------------------------------------------|
| Turkey        | Ankara University Medical Faculty<br>Clinical Research Ethics Committee<br>Ankara Üniversitesi Tıp Fakültesi<br>Dekanlığı Klinik Araştırmalar Etik Kurulu<br>Sıhhiye Ankara, 06100<br>Turkey | C68-TR10005<br>Marmara Üniversitesi Tıp Fakültesi<br>Başbüyük Mah. Maltepe Başbüyük Yolu<br>Sok. No:9/1 Maltepe<br>İstanbul, 34854<br>Turkey | Region: /<br>Site, Central: Mar 14,<br>2016 Site, Local: / |
| Turkey        | Ankara University Medical Faculty<br>Clinical Research Ethics Committee<br>Ankara Üniversitesi Tıp Fakültesi<br>Dekanlığı Klinik Araştırmalar Etik Kurulu<br>Sıhhiye Ankara, 06100<br>Turkey | C68-TR10007<br>Görükle<br>Bursa, 16285<br>Turkey                                                                                             | Region: /<br>Site, Central: Mar 14,<br>2016 Site, Local: / |

**Table S2** Example typical patient goals per category

| Goal category | Example Patient Goal                                                                                                           | Example SMART Goal                                                                                                                                                   |
|---------------|--------------------------------------------------------------------------------------------------------------------------------|----------------------------------------------------------------------------------------------------------------------------------------------------------------------|
| Self          | <ul style="list-style-type: none"> <li>• Find employment</li> <li>• Lose weight</li> </ul>                                     | <ul style="list-style-type: none"> <li>• Obtain three job interviews in the next 6 months</li> <li>• Lose 5 kg in the next 3 months</li> </ul>                       |
| Social        | <ul style="list-style-type: none"> <li>• Social relationships</li> <li>• Improvement in relationships</li> </ul>               | <ul style="list-style-type: none"> <li>• Go out at least three times per week</li> <li>• Regular involvement in social activities at least twice per week</li> </ul> |
| Family        | <ul style="list-style-type: none"> <li>• Improve relationship with father</li> <li>• Be able to cook for the family</li> </ul> | <ul style="list-style-type: none"> <li>• Go out for dinner with father</li> <li>• Carry out the cooking most days of the week according to family needs</li> </ul>   |
| Illness       | <ul style="list-style-type: none"> <li>• Achieve remission</li> <li>• To be more active in rehabilitation</li> </ul>           | <ul style="list-style-type: none"> <li>• Be symptom-free in 6 months</li> <li>• Visit rehabilitation program four times per week</li> </ul>                          |

**Notes:** Patients were asked to set goals and subsequently set SMART goals with their physician.

**Abbreviation:** SMART, Specific, Measurable, Attainable, Relevant, and Time-Bound.

**Table S3** Perceived importance and difficulty of goals by goal category for first goals set

|                          |                     | <b>Self</b><br><b>(n=248)</b> | <b>Social</b><br><b>(n=64)</b> | <b>Family</b><br><b>(n=37)</b> | <b>Illness</b><br><b>(n=12)</b> |
|--------------------------|---------------------|-------------------------------|--------------------------------|--------------------------------|---------------------------------|
| <b>Importance, n (%)</b> | Important           | 130 (52.4)                    | 27 (42.2)                      | 16 (43.2)                      | 7 (58.3)                        |
|                          | Very important      | 93 (37.5)                     | 35 (54.7)                      | 13 (35.1)                      | 4 (33.3)                        |
|                          | Extremely important | 25 (10.1)                     | 2 (3.1)                        | 8 (21.6)                       | 1 (8.3)                         |
| <b>Difficulty, n (%)</b> | Not difficult       | 7 (2.8)                       | 2 (3.1)                        | 1 (2.7)                        | 0 (0.0)                         |
|                          | Minor difficulty    | 100 (40.3)                    | 19 (29.7)                      | 14 (37.8)                      | 5 (41.7)                        |
|                          | Moderate difficulty | 125 (50.4)                    | 35 (54.7)                      | 20 (54.1)                      | 7 (58.3)                        |
|                          | Extreme difficulty  | 16 (6.5)                      | 8 (12.5)                       | 2 (5.4)                        | 0 (0.0)                         |

## Relationship between symptomatic remission, goal achievement, and WHODAS scores across different WHODAS domains

(A) SR LOCF=Yes, Achieved goal=Yes

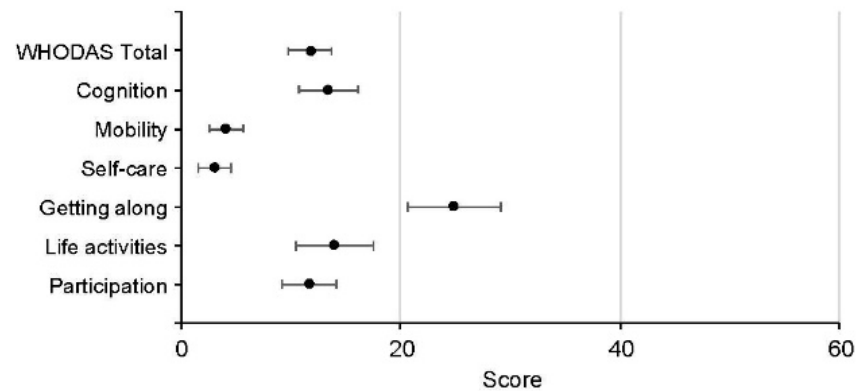

(B) SR LOCF=Yes, Achieved goal=No

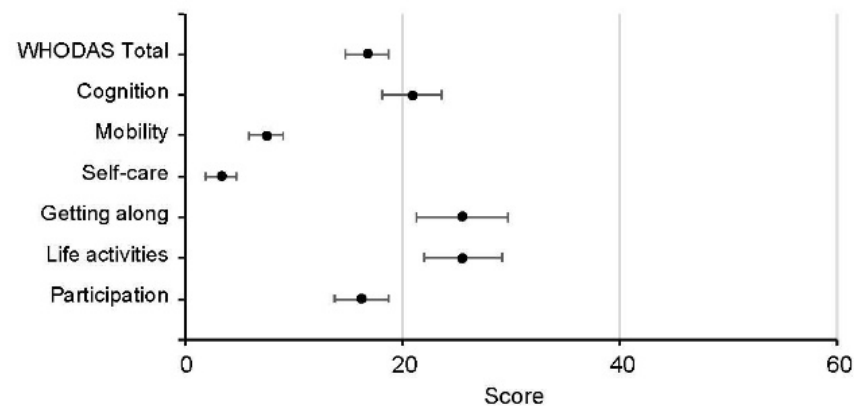

(C) SR LOCF=No, Achieved goal=Yes

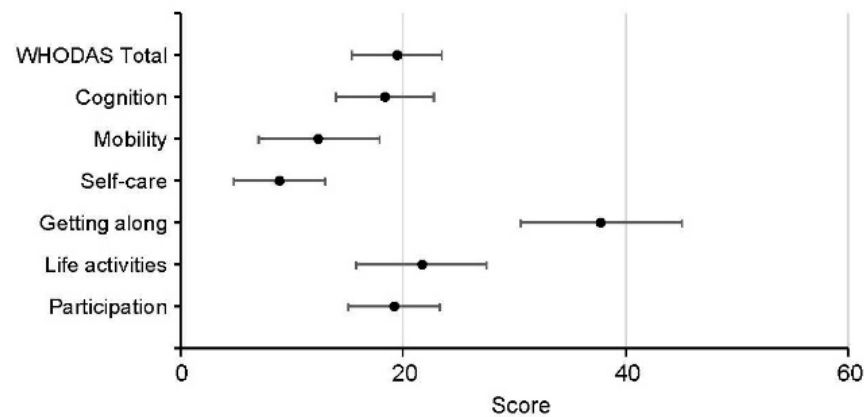

(D) SR LOCF=No, Achieved goal=No

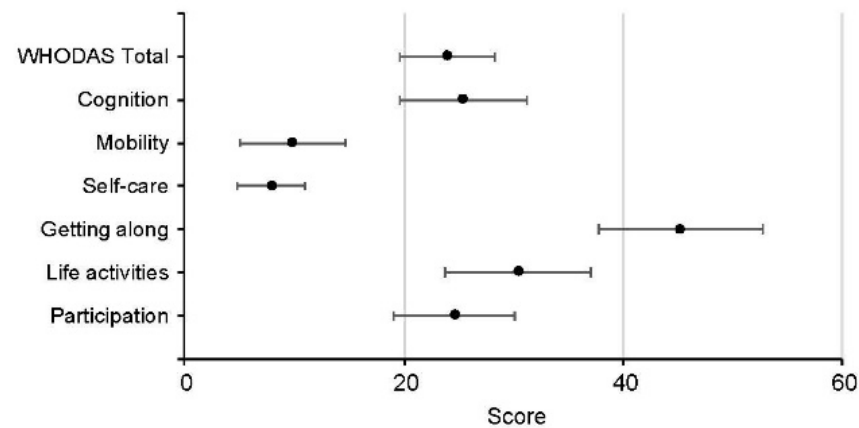

**Figure S1** WHODAS mean total and domain scores for patients who achieved symptomatic remission at LOCF endpoint and achieved at least one goal (A); who achieved symptomatic remission but did not achieve any goals (B); who did not achieve symptomatic remission but achieved at least one goal (C); and who did not achieve symptomatic remission nor any goals (D). Error bars show 95% CIs.

**Abbreviations:** CI, confidence interval; LOCF, last observation carried forward; SR, symptomatic remission; WHODAS, World Health Organization Disability Assessment Schedule.
